# Supplementary material for: Correlation between Blunted Nocturnal Decrease in Diastolic Blood Pressure and Oxidative Stress: An Observational Study
Source: MDPI journal article supplement (doi:10.3390/antiox11122430), 2022-12-09
Supplement: s1 [file s1]

**Table S1.** Binary logistic regression models for the presence of a non-dipper DBP profile based on each of the evaluated redox parameters.

| Variables                                                                                                                                                                     | B      | P-value | Exp(B) | 95%CI    |          |
|-------------------------------------------------------------------------------------------------------------------------------------------------------------------------------|--------|---------|--------|----------|----------|
|                                                                                                                                                                               |        |         |        | Inferior | Superior |
| <b>TBARS.</b> Model summary: P-value (F-test)< 0.001, P-value (Hosmer and Lemeshow)= 0.523, -2LL= 202.2, R <sup>2</sup> (Nagelkerke)= 0.293, Overall accuracy= 0.79.          |        |         |        |          |          |
| nSBP (mmHg)                                                                                                                                                                   | 0.037  | 0.075   | 1.038  | 0.996    | 1.081    |
| nDBP (mmHg)                                                                                                                                                                   | 0.056  | 0.059   | 1.057  | 0.998    | 1.120    |
| Diuretic use (yes)                                                                                                                                                            | 1.004  | 0.007   | 2.728  | 1.308    | 5.692    |
| TBARS (nmol/mg)                                                                                                                                                               | 0.738  | 0.002   | 2.091  | 1.319    | 3.316    |
| <b>Reduced thiols.</b> Model summary: P-value (F-test)< 0.001, P-value (Hosmer and Lemeshow)= 0.095, -2LL= 204.9, R <sup>2</sup> (Nagelkerke)= 0.274, Overall accuracy= 0.79. |        |         |        |          |          |
| Alcohol intake (yes)                                                                                                                                                          | 0.732  | 0.082   | 2.080  | 0.912    | 4.744    |
| nSBP (mmHg)                                                                                                                                                                   | 0.039  | 0.060   | 1.040  | 0.998    | 1.083    |
| nDBP (mmHg)                                                                                                                                                                   | 0.040  | 0.099   | 1.050  | 0.991    | 1.113    |
| Diuretic use (yes)                                                                                                                                                            | 0.636  | 0.085   | 1.889  | 0.916    | 3.895    |
| Reduced thiols (μmol/mg)                                                                                                                                                      | -1.772 | 0.042   | 0.170  | 0.031    | 0.939    |
| <b>Vitamin E.</b> Model summary: P-value (F-test)< 0.001, P-value (Hosmer and Lemeshow)= 0.331, -2LL= 202.8, R <sup>2</sup> (Nagelkerke)= 0.269, Overall accuracy= 0.78.      |        |         |        |          |          |
| Alcohol intake                                                                                                                                                                | 0.863  | 0.044   | 2.370  | 1.022    | 5.498    |
| nSBP (mmHg)                                                                                                                                                                   | 0.039  | 0.061   | 1.039  | 0.998    | 1.082    |
| nDBP (mmHg)                                                                                                                                                                   | 0.050  | 0.091   | 1.051  | 0.992    | 1.114    |
| Diuretic use                                                                                                                                                                  | 0.653  | 0.077   | 1.922  | 0.931    | 3.967    |
| Vitamin E (μg/mg)                                                                                                                                                             | -0.042 | 0.094   | 0.959  | 0.913    | 1.007    |
| <b>Vitamin A.</b> Model summary: P-value (F-test)< 0.001, P-value (Hosmer and Lemeshow)= 0.280, -2LL= 199.2, R <sup>2</sup> (Nagelkerke)= 0.289, Overall accuracy= 0.78.      |        |         |        |          |          |
| Alcohol intake (yes)                                                                                                                                                          | 0.997  | 0.024   | 2.710  | 1.142    | 6.435    |
| nSBP (mmHg)                                                                                                                                                                   | 0.038  | 0.066   | 1.039  | 0.998    | 1.082    |
| nDBP (mmHg)                                                                                                                                                                   | 0.052  | 0.078   | 1.054  | 0.994    | 1.117    |
| Diuretic use (yes)                                                                                                                                                            | 0.740  | 0.047   | 2.095  | 1.009    | 4.351    |

|                   |        |       |       |       |       |
|-------------------|--------|-------|-------|-------|-------|
| Vitamin A (µg/mg) | -1.225 | 0.016 | 0.294 | 0.109 | 0.792 |
|-------------------|--------|-------|-------|-------|-------|

**Copper.** Model summary: *P*-value (*F*-test) < 0.001, *P*-value (Hosmer and Lemeshow) = 0.513, -2LL = 210.6, *R*<sup>2</sup> (Nagelkerke) = 0.243, Overall accuracy = 0.78.

|                |       |         |       |       |       |
|----------------|-------|---------|-------|-------|-------|
| Age (years)    | 0.045 | 0.014   | 1.046 | 1.009 | 1.084 |
| nDBP (mmHg)    | 0.112 | < 0.001 | 1.118 | 1.073 | 1.165 |
| Copper (µg/dL) | 0.017 | 0.049   | 1.017 | 1.001 | 1.035 |

**TBARS/Thiol ratio.** Model summary: *P*-value (*F*-test) < 0.001, *P*-value (Hosmer and Lemeshow) = 0.625, -2LL = 200.5, *R*<sup>2</sup> (Nagelkerke) = 0.296, Overall accuracy = 0.80.

|                    |       |         |       |       |       |
|--------------------|-------|---------|-------|-------|-------|
| Diuretic use (yes) | 0.823 | 0.025   | 2.276 | 1.106 | 4.684 |
| nDBP (mmHg)        | 0.096 | < 0.001 | 1.101 | 1.059 | 1.144 |
| TBARS/Thiol ratio  | 0.475 | < 0.001 | 1.609 | 1.246 | 2.075 |

**TBARS/Vitamin E ratio.** Model summary: *P*-value (*F*-test) < 0.001, *P*-value (Hosmer and Lemeshow) = 0.377, -2LL = 190.9, *R*<sup>2</sup> (Nagelkerke) = 0.312, Overall accuracy = 0.78.

|                       |       |       |       |       |       |
|-----------------------|-------|-------|-------|-------|-------|
| Alcohol intake (yes)  | 0.821 | 0.061 | 2.273 | 0.964 | 5.357 |
| Diuretic use (yes)    | 0.677 | 0.076 | 1.967 | 0.931 | 4.159 |
| nSBP (mmHg)           | 0.038 | 0.073 | 1.039 | 0.996 | 1.083 |
| nDBP (mmHg)           | 0.051 | 0.089 | 1.053 | 0.992 | 1.117 |
| TBARS/Vitamin E ratio | 0.135 | 0.002 | 1.144 | 1.051 | 1.246 |

**TBARS/Vitamin A ratio.** Model summary: *P*-value (*F*-test) < 0.001, *P*-value (Hosmer and Lemeshow) = 0.135, -2LL = 188.3, *R*<sup>2</sup> (Nagelkerke) = 0.326, Overall accuracy = 0.82.

|                       |       |         |       |       |       |
|-----------------------|-------|---------|-------|-------|-------|
| Alcohol intake (yes)  | 0.967 | 0.029   | 2.631 | 1.106 | 6.258 |
| Diuretic use (yes)    | 0.740 | 0.056   | 2.096 | 0.981 | 4.481 |
| nDBP (mmHg)           | 0.093 | < 0.001 | 1.098 | 1.054 | 1.143 |
| TBARS/Vitamin A ratio | 0.896 | < 0.001 | 2.450 | 1.578 | 3.805 |

DBP—Diastolic blood pressure. TBARS—Thiobarbituric acid reactive substances. nSBP—Nocturnal systolic blood pressure. nDBP—Nocturnal DBP. -2LL—2\*log-likelihood. *R*<sup>2</sup>—Determination coefficient.
